# Supplementary material for: Aspirin and cancer survival-related pathways: a review and analysis of molecular mechanisms
Source: Research Square preprint supplement (doi:10.21203/rs.3.rs-2397971/v1), 2023-01-11
Supplement: Supplementary file 2 [file d9ff81708f702e853a925bc0.docx]

Additional file 1: Showing type of gene-gene interaction and weight between 11 main and their interacting genes

| Gene 1 | Gene 2 | Weight | Network group |
| --- | --- | --- | --- |
| VEGFA | FLT1 | 0.020744 | Co-expression |
| VEGFR | FLT1 | 0.016419 | Co-expression |
| p53 | NFKB1 | 0.010398 | Co-expression |
| GREM1 | NFKB1 | 0.012934 | Co-expression |
| VEGFC | FLT1 | 0.015285 | Co-expression |
| VEGFC | VEGFR | 0.013902 | Co-expression |
| SHISA2 | VEGFC | 0.013704 | Co-expression |
| NFKB1 | PTGS2 | 0.025296 | Co-expression |
| NFKB1 | PARP1 | 0.02428 | Co-expression |
| HIF1A | VEGFA | 0.013041 | Co-expression |
| HRAS | CENPB | 0.010719 | Co-expression |
| VEGFR | FLT1 | 0.01931 | Co-expression |
| VEGFB | PTGES2 | 0.009474 | Co-expression |
| VEGFR | FLT1 | 0.014055 | Co-expression |
| VEGFC | VEGFR | 0.005695 | Co-expression |
| NRP2 | VEGFC | 0.010776 | Co-expression |
| HIF1A | REL | 0.010267 | Co-expression |
| NRP1 | VEGFR | 0.013921 | Co-expression |
| CENPB | VEGFB | 0.005867 | Co-expression |
| p53 | PTGS2 | 0.009865 | Co-expression |
| VEGFC | VEGFR | 0.011381 | Co-expression |
| VEGFC | PGF | 0.010706 | Co-expression |
| REL | VEGFA | 0.020182 | Co-expression |
| HIF1A | VEGFR | 0.009953 | Co-expression |
| HRAS | VEGFB | 0.012284 | Co-expression |
| VEGFA | PTGS2 | 0.010792 | Co-expression |
| VEGFC | NFKB1 | 0.015597 | Co-expression |
| FLT4 | VEGFR | 0.015038 | Co-expression |
| HIF1A | PTGS2 | 0.011642 | Co-expression |
| NRP1 | PTK2 | 0.012855 | Co-expression |
| HRAS | VEGFB | 0.022873 | Co-expression |
| NFKB1 | PTGS2 | 0.008028 | Co-expression |
| VEGFC | VEGFR | 0.002712 | Co-expression |
| REL | NFKB1 | 0.008002 | Co-expression |
| ARNT | PARP1 | 0.011595 | Co-expression |
| CENPB | VEGFR | 0.002159 | Co-expression |
| p53 | VEGFR | 0.251096 | Genetic Interactions |
| REL | NFKB1 | 1 | Genetic Interactions |
| VEGFA | FLT1 | 0.765367 | Physical Interactions |
| VEGFR | VEGFA | 0.414214 | Physical Interactions |
| GREM1 | VEGFR | 0.765367 | Physical Interactions |
| VEGFA | FLT1 | 0.259808 | Physical Interactions |
| VEGFR | VEGFA | 0.294428 | Physical Interactions |
| p53 | PTGS2 | 0.174421 | Physical Interactions |
| PGF | FLT1 | 0.353001 | Physical Interactions |
| VEGFC | VEGFR | 0.361476 | Physical Interactions |
| FLT4 | VEGFC | 0.696859 | Physical Interactions |
| NRP2 | VEGFA | 0.335654 | Physical Interactions |
| NRP2 | PGF | 0.456053 | Physical Interactions |
| PLCG1 | FLT1 | 0.080979 | Physical Interactions |
| PLCG1 | VEGFR | 0.09177 | Physical Interactions |
| HIF1A | p53 | 0.015081 | Physical Interactions |
| ARNT | HIF1A | 0.068108 | Physical Interactions |
| SPAG9 | NFKB1 | 0.58416 | Physical Interactions |
| APPL1 | PIK3CA | 0.554 | Physical Interactions |
| HRAS | PIK3CA | 0.222599 | Physical Interactions |
| VEGFA | FLT1 | 0.6867 | Physical Interactions |
| VEGFB | VEGFA | 0.352144 | Physical Interactions |
| REL | NFKB1 | 0.086294 | Physical Interactions |
| ARNT | HIF1A | 0.077247 | Physical Interactions |
| SHISA2 | PTGES2 | 0.527581 | Physical Interactions |
| VEGFR | VEGFA | 0.344082 | Physical Interactions |
| p53 | PTGS2 | 0.008964 | Physical Interactions |
| p53 | PARP1 | 0.004882 | Physical Interactions |
| NOS3 | p53 | 0.023252 | Physical Interactions |
| HIF1A | p53 | 0.003357 | Physical Interactions |
| PTK2 | p53 | 0.003493 | Physical Interactions |
| NRP1 | PGF | 0.870522 | Physical Interactions |
| CENPB | PARP2 | 0.539726 | Physical Interactions |
| CENPB | PARP1 | 0.068953 | Physical Interactions |
| SPAG9 | NFKB1 | 0.098695 | Physical Interactions |
| p53 | PTGS2 | 0.098602 | Physical Interactions |
| p53 | PARP1 | 0.012737 | Physical Interactions |
| CENPB | PARP2 | 0.556068 | Physical Interactions |
| CENPB | PARP1 | 0.170838 | Physical Interactions |
| VEGFR | VEGFA | 0.164772 | Physical Interactions |
| p53 | PARP1 | 0.006442 | Physical Interactions |
| FLT4 | VEGFR | 0.169992 | Physical Interactions |
| PLCG1 | VEGFR | 0.024351 | Physical Interactions |
| PTK2 | p53 | 0.008655 | Physical Interactions |
| NRP1 | VEGFA | 0.656783 | Physical Interactions |
| NRP1 | VEGFR | 0.120273 | Physical Interactions |
| HRAS | PIK3CA | 0.032061 | Physical Interactions |
| VEGFA | FLT1 | 0.247389 | Physical Interactions |
| VEGFR | VEGFA | 0.093198 | Physical Interactions |
| VEGFB | FLT1 | 0.842676 | Physical Interactions |
| FLT4 | VEGFC | 0.519377 | Physical Interactions |
| VEGFD | FLT4 | 0.519377 | Physical Interactions |
| PARP3 | PARP1 | 0.290457 | Physical Interactions |
| NRP1 | VEGFA | 0.259738 | Physical Interactions |
| ARNT | HIF1A | 0.069681 | Physical Interactions |
| APPL1 | PIK3CA | 0.135466 | Physical Interactions |
| VEGFR | VEGFA | 0.360202 | Predicted |
| FLT4 | VEGFC | 0.578164 | Predicted |
| VEGFD | VEGFR | 0.63931 | Predicted |
| PLCG1 | FLT1 | 0.157518 | Predicted |
| CENPB | PARP1 | 0.52775 | Predicted |
| PARP1 | PARP2 | 0.121717 | Predicted |
| NFKB1 | PARP1 | 0.017072 | Predicted |
| p53 | PARP1 | 0.006247 | Predicted |
| PGF | VEGFA | 0.153457 | Predicted |
| VEGFB | VEGFA | 0.21321 | Predicted |
| FLT4 | FLT1 | 0.211842 | Predicted |
| VEGFD | VEGFC | 0.796225 | Predicted |
| VEGFD | VEGFB | 0.380021 | Predicted |
| NRP2 | PGF | 0.140402 | Predicted |
| PARP3 | PARP1 | 0.335989 | Predicted |
| PTK2 | FLT1 | 0.03153 | Predicted |
| PTK2 | p53 | 0.004455 | Predicted |
| PTK2 | FLT4 | 0.075653 | Predicted |
| PTK2 | PLCG1 | 0.011178 | Predicted |
| NRP1 | PGF | 0.103095 | Predicted |
| NRP1 | NRP2 | 0.086735 | Predicted |
| CENPB | PARP1 | 0.335989 | Predicted |
| APPL1 | PIK3CA | 0.127628 | Predicted |
| PARP1 | PARP2 | 0.152838 | Shared protein domains |
| VEGFR | FLT1 | 0.027243 | Shared protein domains |
| p53 | NFKB1 | 0.009621 | Shared protein domains |
| PGF | VEGFA | 0.052649 | Shared protein domains |
| VEGFC | VEGFA | 0.055282 | Shared protein domains |
| VEGFC | PGF | 0.053835 | Shared protein domains |
| VEGFB | VEGFA | 0.083625 | Shared protein domains |
| VEGFB | PGF | 0.052649 | Shared protein domains |
| VEGFB | VEGFC | 0.055282 | Shared protein domains |
| FLT4 | FLT1 | 0.031181 | Shared protein domains |
| FLT4 | VEGFR | 0.03434 | Shared protein domains |
| VEGFD | VEGFA | 0.054009 | Shared protein domains |
| VEGFD | PGF | 0.052595 | Shared protein domains |
| VEGFD | VEGFC | 0.055226 | Shared protein domains |
| VEGFD | VEGFB | 0.054009 | Shared protein domains |
| REL | NFKB1 | 0.054156 | Shared protein domains |
| REL | p53 | 0.013134 | Shared protein domains |
| PARP3 | PARP2 | 0.277026 | Shared protein domains |
| PARP3 | PARP1 | 0.152838 | Shared protein domains |
| PTK2 | PIK3CA | 0.002971 | Shared protein domains |
| PTK2 | FLT1 | 0.006622 | Shared protein domains |
| PTK2 | VEGFR | 0.007295 | Shared protein domains |
| PTK2 | FLT4 | 0.008728 | Shared protein domains |
| NRP1 | NRP2 | 0.075612 | Shared protein domains |
| ARNT | HIF1A | 0.015578 | Shared protein domains |
| PARP1 | PARP2 | 0.13543 | Shared protein domains |
| VEGFR | FLT1 | 0.072263 | Shared protein domains |
| PGF | VEGFA | 0.14711 | Shared protein domains |
| VEGFC | VEGFA | 0.14711 | Shared protein domains |
| VEGFC | PGF | 0.14711 | Shared protein domains |
| VEGFB | VEGFA | 0.14711 | Shared protein domains |
| VEGFB | PGF | 0.14711 | Shared protein domains |
| VEGFB | VEGFC | 0.14711 | Shared protein domains |
| FLT4 | FLT1 | 0.070847 | Shared protein domains |
| FLT4 | VEGFR | 0.070847 | Shared protein domains |
| VEGFD | VEGFA | 0.14711 | Shared protein domains |
| VEGFD | PGF | 0.14711 | Shared protein domains |
| VEGFD | VEGFC | 0.14711 | Shared protein domains |
| VEGFD | VEGFB | 0.14711 | Shared protein domains |
| REL | NFKB1 | 0.046424 | Shared protein domains |
| PARP3 | PARP2 | 0.215495 | Shared protein domains |
| PARP3 | PARP1 | 0.13543 | Shared protein domains |
| NRP1 | NRP2 | 0.059382 | Shared protein domains |
| ARNT | HIF1A | 0.019222 | Shared protein domains |
