# Supplementary material for: Aspirin and cancer survival-related pathways: a review and analysis of molecular mechanisms
Source: Research Square preprint supplement (doi:10.21203/rs.3.rs-2397971/v1), 2023-01-11
Supplement: Supplementary file 3 [file c651b790cc56e828956adfde.pdf]

# Programmed Cell Death

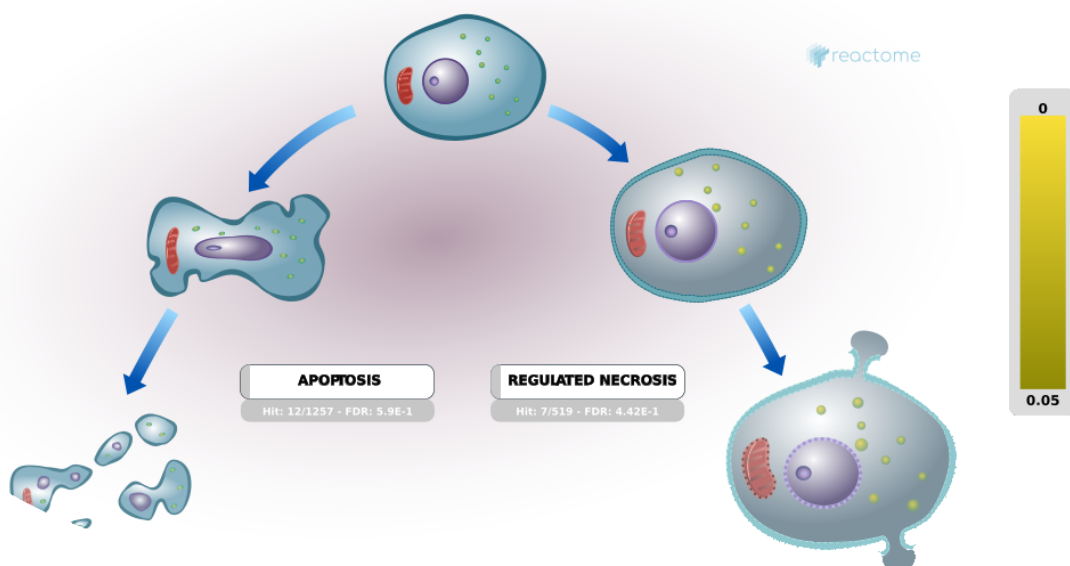

Alnemri, E., Chan, FK., Gillespie, ME., Gopinathrao, G., Hardwick, JM., Hengartner, M., Joshi-Tope, G., Matthews, L., Ranganathan, S., Shamovsky, V., Tschopp, J., Tsujimoto, Y., Vaux, DL.

European Bioinformatics Institute, New York University Langone Medical Center, Ontario Institute for Cancer Research, Oregon Health and Science University.

The contents of this document may be freely copied and distributed in any media, provided the authors, plus the institutions, are credited, as stated under the terms of [Creative Commons Attribution 4.0 International \(CC BY 4.0\) License](#). For more information see our [license](#).

## Introduction

Reactome is open-source, open access, manually curated and peer-reviewed pathway database. Pathway annotations are authored by expert biologists, in collaboration with Reactome editorial staff and cross-referenced to many bioinformatics databases. A system of evidence tracking ensures that all assertions are backed up by the primary literature. Reactome is used by clinicians, geneticists, genomics researchers, and molecular biologists to interpret the results of high-throughput experimental studies, by bioinformaticians seeking to develop novel algorithms for mining knowledge from genomic studies, and by systems biologists building predictive models of normal and disease variant pathways.

The development of Reactome is supported by grants from the US National Institutes of Health (P41 HG003751), University of Toronto (CFREF Medicine by Design), European Union (EU STRP, EMI-CD), and the European Molecular Biology Laboratory (EBI Industry program).

## Literature references

- Fabregat, A., Sidiropoulos, K., Viteri, G., Forner, O., Marin-Garcia, P., Arnau, V. et al. (2017). Reactome pathway analysis: a high-performance in-memory approach. *BMC bioinformatics*, 18, 142. [↗](#)
- Sidiropoulos, K., Viteri, G., Sevilla, C., Jupe, S., Webber, M., Orlic-Milacic, M. et al. (2017). Reactome enhanced pathway visualization. *Bioinformatics*, 33, 3461-3467. [↗](#)
- Fabregat, A., Jupe, S., Matthews, L., Sidiropoulos, K., Gillespie, M., Garapati, P. et al. (2018). The Reactome Pathway Knowledgebase. *Nucleic Acids Res*, 46, D649-D655. [↗](#)
- Fabregat, A., Korninger, F., Viteri, G., Sidiropoulos, K., Marin-Garcia, P., Ping, P. et al. (2018). Reactome graph database: Efficient access to complex pathway data. *PLoS computational biology*, 14, e1005968. [↗](#)

Reactome database release: 81

This document contains 3 pathways ([see Table of Contents](#))

## Analysis properties

- This is an **overrepresentation** analysis: A statistical (hypergeometric distribution) test that determines whether certain Reactome pathways are over-represented (enriched) in the submitted data. It answers the question 'Does my list contain more proteins for pathway X than would be expected by chance?' This test produces a probability score, which is corrected for false discovery rate using the Benjamini-Hochberg method. [See more](#)
- 39 out of 39 identifiers in the sample were found in Reactome, where 1141 pathways were hit by at least one of them.
- All non-human identifiers have been converted to their human equivalent. [↗](#)
- IntAct interactors were included to increase the analysis background. This greatly increases the size of Reactome pathways, which maximises the chances of matching your submitted identifiers to the expanded pathway, but will include interactors that have not undergone manual curation by Reactome and may include interactors that have no biological significance, or unexplained relevance.
- This report is filtered to show only results for species 'Homo sapiens' and resource 'all resources'.
- The unique ID for this analysis (token) is MjAyMjA5MDEwNDA3MzZfMzEyNTc%3D. This ID is valid for at least 7 days in Reactome's server. Use it to access Reactome services with your data.

Programmed Cell Death ↗

Stable identifier: R-HSA-5357801

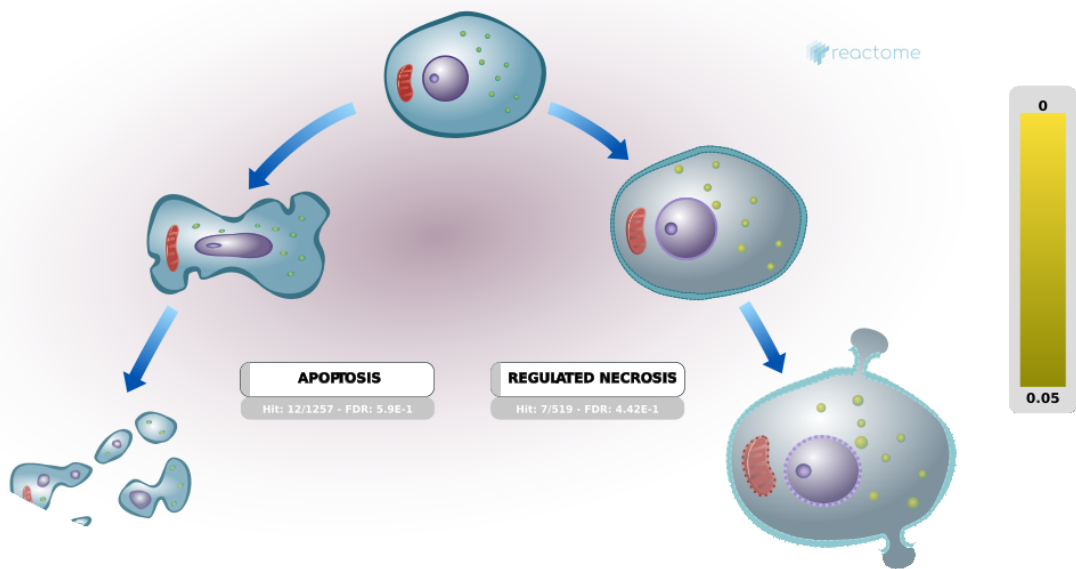

Cell death is a fundamental cellular response that has a crucial role in shaping our bodies during development and in regulating tissue homeostasis by eliminating unwanted cells. There are a number of different forms of cell death, each with a corresponding number of complex subprocesses. The first form of regulated or programmed cell death to be characterized was apoptosis. Evidence has emerged for a number of regulated non-apoptotic cell death pathways, including some with morphological features that were previously attributed to necrosis. More recently necrosis has been subdivided into parts including programmed necrotic cell death processes, such as RIP1-mediated regulated necrosis or pyroptosis.

Reactome currently represents programmed cell death using the model of extrinsic signalling that leads to a molecular decision point pivoting on caspase-8 activation or inhibition. Caspase-8 activation tilts the cell towards apoptosis, while caspase-8 inhibition tilts the cell towards Regulated Necrosis.

The terminology and molecular definitions of cell death-related events annotated here are consistent with the 2015 recommendations of the Nomenclature Committee on Cell Death (NCCD) (Galluzzi L et al. 2015).

Literature references

Szabadkai, G., Kepp, O., Nunez, G., Aaronson, SA., Bredesen, DE., Abrams, JM. et al. (2015). Essential versus accessory aspects of cell death: recommendations of the NCCD 2015. *Cell Death Differ.*, 22, 58-73. ↗

Editions

2014-11-18

Authored, Edited

Shamovsky, V.

6 submitted entities found in this pathway, mapping to 8 Reactome entities

| Input | UniProt Id | Input | UniProt Id | Input | UniProt Id     |
|-------|------------|-------|------------|-------|----------------|
| BAX   | Q07812     | BCL2  | P10415     | IL1B  | P01583, P01584 |
| MAPK  | P28482     | STAT3 | P40763     | p53   | P04637         |

| Input | Ensembl Id      |
|-------|-----------------|
| BCL2  | ENSG00000171791 |

### Interactors found in the analysis (9)

| Input | UniProt Id       | Interacts with                                 | Input | UniProt Id       | Interacts with                                                         |
|-------|------------------|------------------------------------------------|-------|------------------|------------------------------------------------------------------------|
| BAX   | Q07812, Q07813-1 | Q07817, Q16611, O43521, P10415, Q07812, P55957 | BCL2  | P10415, P10415-1 | P51572, Q92934, Q16611, O43521, P10415, Q07812, P55957, Q13794, Q9BXH1 |
| EGFR  | P00533           | P10636, P12830, Q8WUM4, P45983, P06396, Q05397 | Myc   | P01106           | O60313, P06396                                                         |
| NFKB1 | P19838           | P35222                                         | PARP1 | P09874           | P09429                                                                 |
| STAT3 | P40763           | P51813                                         | TNF   | P01375           | Q13546, Q13490                                                         |
| p53   | P04637           | P09429, Q05655, P10415, Q8N726, Q05397         |       |                  |                                                                        |

## Apoptosis ↗

**Location:** Programmed Cell Death

**Stable identifier:** R-HSA-109581

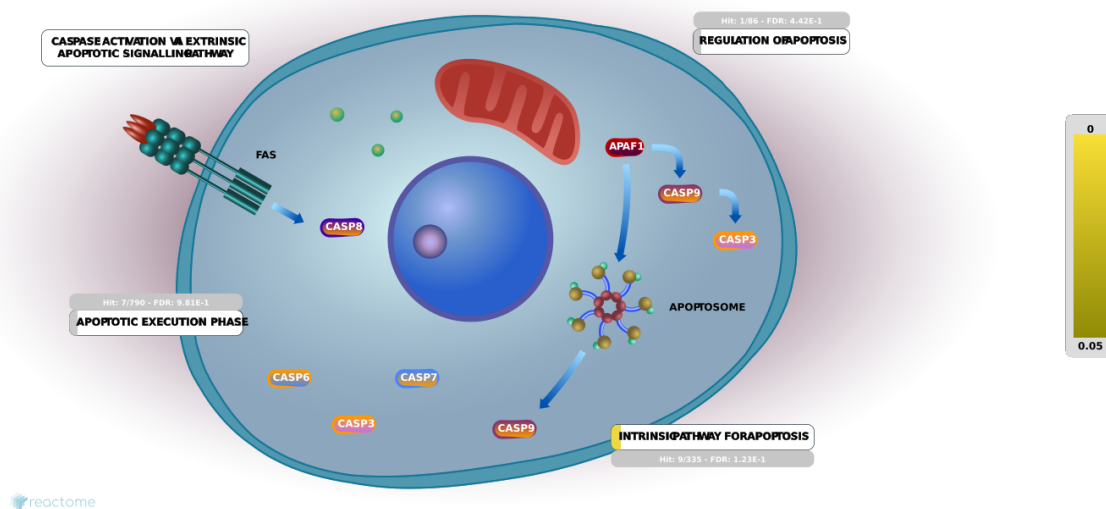

Apoptosis is a distinct form of cell death that is functionally and morphologically different from necrosis. Nuclear chromatin condensation, cytoplasmic shrinking, dilated endoplasmic reticulum, and membrane blebbing characterize apoptosis in general. Mitochondria remain morphologically unchanged. In 1972 Kerr et al introduced the concept of apoptosis as a distinct form of "cell-death", and the mechanisms of various apoptotic pathways are still being revealed today.

The two principal pathways of apoptosis are (1) the Bcl-2 inhibitable or intrinsic pathway induced by various forms of stress like intracellular damage, developmental cues, and external stimuli and (2) the caspase 8/10 dependent or extrinsic pathway initiated by the engagement of death receptors

The caspase 8/10 dependent or extrinsic pathway is a death receptor mediated mechanism that results in the activation of caspase-8 and caspase-10. Activation of death receptors like Fas/CD95, TNFR1, and the TRAIL receptor is promoted by the TNF family of ligands including FASL (APO1L OR CD95L), TNF, LT-alpha, LT-beta, CD40L, LIGHT, RANKL, BLYS/BAFF, and APO2L/TRAIL. These ligands are released in response to microbial infection, or as part of the cellular, humoral immunity responses during the formation of lymphoid organs, activation of dendritic cells, stimulation or survival of T, B, and natural killer (NK) cells, cytotoxic response to viral infection or oncogenic transformation.

The Bcl-2 inhibitable or intrinsic pathway of apoptosis is a stress-inducible process, and acts through the activation of caspase-9 via Apaf-1 and cytochrome c. The rupture of the mitochondrial membrane, a rapid process involving some of the Bcl-2 family proteins, releases these molecules into the cytoplasm. Examples of cellular processes that may induce the intrinsic pathway in response to various damage signals include: auto reactivity in lymphocytes, cytokine deprivation, calcium flux or cellular damage by cytotoxic drugs like taxol, deprivation of nutrients like glucose and growth factors like EGF, anoikis, transactivation of target genes by tumor suppressors including p53.

In many non-immune cells, death signals initiated by the extrinsic pathway are amplified by connections to the intrinsic pathway. The connecting link appears to be the truncated BID (tBID) protein a proteolytic

cleavage product mediated by caspase-8 or other enzymes.

## Literature references

MacFarlane, M., Williams, AC. (2004). Apoptosis and disease: a life or death decision. *EMBO Rep*, 5, 674-8. [↗](#)

Kerr, JF. (2002). History of the events leading to the formulation of the apoptosis concept. *Toxicology*, 181, 471-4. [↗](#)

Adams, JM. (2003). Ways of dying: multiple pathways to apoptosis. *Genes Dev*, 17, 2481-95. [↗](#)

Adams, JM., Huang, DC., Cory, S. (2003). The Bcl-2 family: roles in cell survival and oncogenesis. *Oncogene*, 22, 8590-607. [↗](#)

Currie, AR., Kerr, JF., Wyllie, AH. (1972). Apoptosis: a basic biological phenomenon with wide-ranging implications in tissue kinetics. *Br J Cancer*, 26, 239-57. [↗](#)

## Editions

|            |          |                                                                        |
|------------|----------|------------------------------------------------------------------------|
| 2004-01-16 | Authored | Tsujimoto, Y., Hengartner, M., Alnemri, E., Hardwick, JM., Tschopp, J. |
| 2013-11-25 | Edited   | Gillespie, ME., Gopinathrao, G., Matthews, L., Joshi-Tope, G.          |
| 2022-05-18 | Reviewed | Hengartner, M., Vaux, DL., Ranganathan, S.                             |

## 5 submitted entities found in this pathway, mapping to 6 Reactome entities

| Input | UniProt Id      | Input | UniProt Id | Input | UniProt Id |
|-------|-----------------|-------|------------|-------|------------|
| BAX   | Q07812          | BCL2  | P10415     | MAPK  | P28482     |
| STAT3 | P40763          | p53   | P04637     |       |            |
| Input | Ensembl Id      |       |            |       |            |
| BCL2  | ENSG00000171791 |       |            |       |            |

## Interactors found in the analysis (8)

| Input | UniProt Id       | Interacts with                                 | Input | UniProt Id       | Interacts with                                                         |
|-------|------------------|------------------------------------------------|-------|------------------|------------------------------------------------------------------------|
| BAX   | Q07812, Q07813-1 | Q07817, Q16611, O43521, P10415, Q07812, P55957 | BCL2  | P10415, P10415-1 | P51572, Q92934, Q16611, O43521, P10415, Q07812, Q13794, P55957, Q9BXH1 |
| EGFR  | P00533           | P10636, P12830, P45983, P06396, Q05397         | Myc   | P01106           | O60313, P06396                                                         |
| NFKB1 | P19838           | P35222                                         | STAT3 | P40763           | P51813                                                                 |
| TNF   | P01375           | Q13490                                         | p53   | P04637           | P10415, Q8N726, Q05655, Q05397                                         |

## Regulated Necrosis ↗

**Location:** Programmed Cell Death

**Stable identifier:** R-HSA-5218859

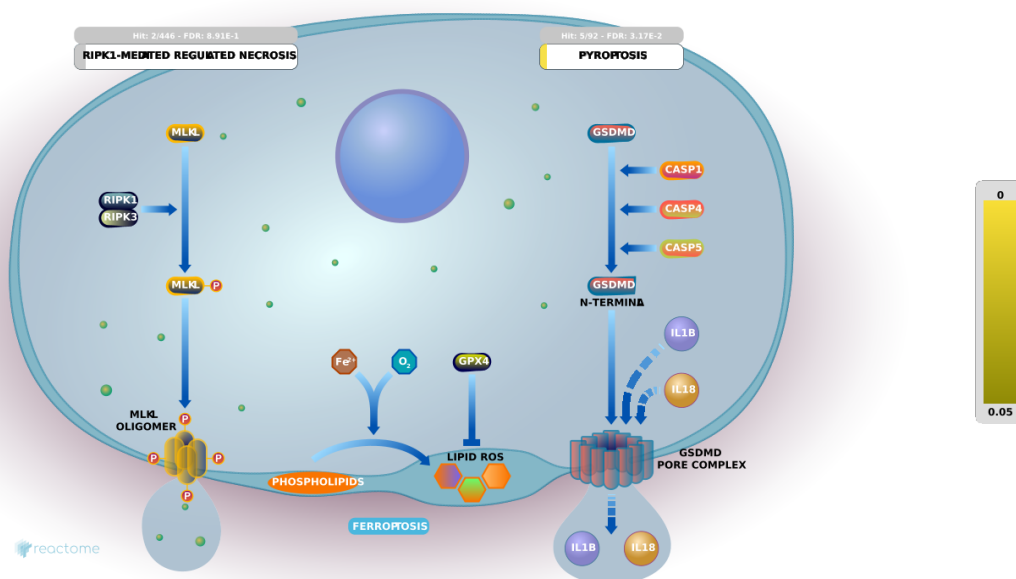

Necrosis has traditionally been considered as a passive, unregulated cell death. However, accumulating evidence suggests that necrosis, like apoptosis, can be executed by genetically controlled and highly regulated cellular process that is morphologically characterized by a loss of cell membrane integrity, intracellular organelles and/or the entire cell swelling (oncosis) (Rello S et al. 2005; Galluzzi L et al. 2007; Berghe TV et al. 2014; Ros U et al. 2020). The morphological hallmarks of the necrotic death have been associated with different forms of programmed cell death including (but not limited to) parthanatos, necroptosis, glutamate-induced oxytosis, ferroptosis, inflammasome-mediated necrosis etc. Each of them can be triggered under certain pathophysiological conditions. For example UV, ROS or alkylating agents may induce poly(ADP-ribose) polymerase 1 (PARP1) hyperactivation (parthanatos), while tumor necrosis factor (TNF) or toll like receptor ligands (LPS and dsRNA) can trigger necrosome-mediated necroptosis. The initiation events, e.g., PARP1 hyperactivation, necrosome formation, activation of NADPH oxidases, in turn trigger one or several common intracellular signals such as NAD<sup>+</sup> and ATP-depletion, enhanced Ca<sup>2+</sup> influx, dysregulation of the redox status, increased production of reactive oxygen species (ROS) and the activity of phospholipases. These signals affect cellular organelles and membranes leading to osmotic swelling, massive energy depletion, lipid peroxidation and the loss of lysosomal membrane integrity. Different mechanisms of permeabilization have emerged depending on the cell death form. Pore formation by gasdermins (GSDMs) is a hallmark of pyroptosis, while mixed lineage kinase domain-like (MLKL) protein facilitates membrane permeabilization in necroptosis, and phospholipid peroxidation leads to membrane damage in ferroptosis. This diverse repertoire of mechanisms leading to membrane permeabilization contributes to define the specific inflammatory and immunological outcome of each type of regulated necrosis. Regulated or programmed necrosis eventually leads to cell lysis and release of cytoplasmic content into the extracellular region that is often associated with a tissue damage resulting in an intense inflammatory response.

The Reactome module describes necroptosis and pyroptosis.



## Literature references

- Vandenabeele, P., Jouan-Lanhouet, S., Vanden Berghe, T., Linkermann, A., Walczak, H. (2014). Regulated necrosis: the expanding network of non-apoptotic cell death pathways. *Nat. Rev. Mol. Cell Biol.*, 15, 135-47. [↗](#)
- Mocarski, ES., Upton, JW., Kaiser, WJ., Livingston-Rosanoff, D., Daley-Bauer, LP. (2014). True grit: programmed necrosis in antiviral host defense, inflammation, and immunogenicity. *J. Immunol.*, 192, 2019-26. [↗](#)
- Nikoletopoulou, V., Tavernarakis, N., Palikaras, K., Markaki, M. (2013). Crosstalk between apoptosis, necrosis and autophagy. *Biochim. Biophys. Acta*, 1833, 3448-59. [↗](#)

## Editions

|            |          |                |
|------------|----------|----------------|
| 2013-12-20 | Authored | Shamovsky, V.  |
| 2014-10-31 | Reviewed | Gillespie, ME. |
| 2015-02-10 | Edited   | Shamovsky, V.  |
| 2015-02-15 | Reviewed | Chan, FK.      |

## 3 submitted entities found in this pathway, mapping to 4 Reactome entities

| Input | UniProt Id | Input | UniProt Id     | Input | UniProt Id |
|-------|------------|-------|----------------|-------|------------|
| BAX   | Q07812     | IL1B  | P01583, P01584 | p53   | P04637     |

## Interactors found in the analysis (4)

| Input | UniProt Id | Interacts with | Input | UniProt Id | Interacts with |
|-------|------------|----------------|-------|------------|----------------|
| EGFR  | P00533     | Q8WUM4         | PARP1 | P09874     | P09429         |
| TNF   | P01375     | Q13546         | p53   | P04637     | P09429         |

# Table of Contents

|                                                                                                         |   |
|---------------------------------------------------------------------------------------------------------|---|
| Introduction                                                                                            | 1 |
| Analysis properties                                                                                     | 2 |
|  Programmed Cell Death | 3 |
|  Apoptosis             | 5 |
|  Regulated Necrosis    | 7 |
| Table of Contents                                                                                       | 9 |
